# Supplementary material for: Theoretical study of the spectroscopy and radiative transition probabilities of Si2 from visible to infrared
Source: Royal Society of Chemistry journal article supplement (doi:10.1039/d3cp02512h), 2023-01-01
Supplement: d3cp02512h1.pdf [file d3cp02512h1.pdf]

***Theoretical study of the spectroscopy and radiative transition  
probabilities of Si<sub>2</sub> from visible to infrared***

Lidan Xiao<sup>a</sup>, Yun Yang<sup>a</sup>, Xinyu Li<sup>a</sup>, Boris F. Minaev<sup>bc\*</sup>, Bing Yan<sup>a\*</sup>

---

<sup>a</sup>*Institute of Atomic and Molecular Physics, Jilin University, Changchun 130012, People's Republic of China;*

<sup>b</sup>*Department of Chemistry and Nanomaterials Science, Bohdan Khmelnytsky National University, Cherkasy, Ukraine*

<sup>c</sup>*Department of Physics and Astronomy, Uppsala University, Uppsala, Sweden*



|                 |                     |         |         |                                                                                                                                                                                                                               |
|-----------------|---------------------|---------|---------|-------------------------------------------------------------------------------------------------------------------------------------------------------------------------------------------------------------------------------|
|                 | Cal <sup>37</sup>   | 2.13    |         |                                                                                                                                                                                                                               |
|                 | Cal <sup>24</sup>   | 2.51    | 0.2530  |                                                                                                                                                                                                                               |
| $B^3\Delta_u$   | This work           | 2.0423  | 0.1752  | $3s\sigma_g^2 3s\sigma_u^2 3p\sigma_g^2 3p\pi_u^1 3p\pi_g^1 (83.1)$                                                                                                                                                           |
| $C^3\Pi_g$      | This work           | 2.5688  | 0.2040  | $3s\sigma_g^2 3s\sigma_u^2 3p\sigma_g^1 3p\pi_u^2 3p\pi_g^1 (80.8)$                                                                                                                                                           |
| $A^3\Sigma^+_u$ | This work           | 4.7270  | 0.1750  | $3s\sigma_g^2 3s\sigma_u^2 3p\sigma_g^2 3p\pi_u^1 3p\pi_g^1 (78.7)$<br>$3s\sigma_g^2 3s\sigma_u^2 3p\sigma_g^0 3p\pi_u^3 3p\pi_g^1 (5.7)$                                                                                     |
| $2^3\Pi_g$      | This work           | 2.4646  | 0.2025  | $3s\sigma_g^2 3s\sigma_u^2 3p\sigma_g^1 3p\pi_u^2 3p\pi_g^1 (80.0)$                                                                                                                                                           |
| $E^3\Phi_g$     | This work           | 2.2776  | 0.1986  | $3s\sigma_g^2 3s\sigma_u^2 3p\sigma_g^1 3p\pi_u^2 3p\pi_g^1 (84.5)$                                                                                                                                                           |
| $2^3\Sigma^+_u$ | This work           | 10.4332 | 0.2087  | $3s\sigma_g^2 3s\sigma_u^2 3p\sigma_g^2 3p\pi_u^1 3p\pi_g^1 (21.9)$<br>$3s\sigma_g^2 3s\sigma_u^2 3p\sigma_g^0 3p\pi_u^3 3p\pi_g^1 (50.1)$<br>$3s\sigma_g^2 3s\sigma_u^2 3p\sigma_g^0 3p\pi_u^1 3p\pi_g^3 (5.6)$              |
| $H^3\Sigma^-_u$ | This work           | 2.1621  | 0.1659  | $3s\sigma_g^2 3s\sigma_u^2 3p\sigma_g^2 3p\pi_u^1 3p\pi_g^1 (60.3)$<br>$3s\sigma_g^2 3s\sigma_u^2 3p\sigma_g^0 3p\pi_u^3 3p\pi_g^1 (6.9)$<br>$3s\sigma_g^2 3s\sigma_u^2 3p\sigma_g^1 3p\pi_u^2 3p\pi_g^0 3p\sigma_u^1 (12.5)$ |
|                 | Exp <sup>9,10</sup> | 1.99    | 0.1699  |                                                                                                                                                                                                                               |
|                 | Exp <sup>12</sup>   | 1.64    | 0.17232 |                                                                                                                                                                                                                               |
| $3^3\Pi_g$      | This work           | 3.2175  | 0.1929  | $3s\sigma_g^2 3s\sigma_u^2 3p\sigma_g^1 3p\pi_u^2 3p\pi_g^1 (78.7)$                                                                                                                                                           |
| $2^3\Delta_u$   | This work           | 4.9558  | 0.2182  | $3s\sigma_g^2 3s\sigma_u^2 3p\sigma_g^0 3p\pi_u^3 3p\pi_g^1 (75.1)$                                                                                                                                                           |
| $2^3\Pi_u$      | This work           | 1.7191  | 0.1022  | $3s\sigma_g^2 3s\sigma_u^2 3p\sigma_g^1 3p\pi_u^1 3p\pi_g^2 (55.47)$<br>$3s\sigma_g^2 3s\sigma_u^2 3p\sigma_g^0 3p\pi_u^2 3p\pi_g^1 3p\sigma_u^1 (21.19)$<br>$3s\sigma_g^2 3s\sigma_u^2 3p\sigma_g^1 3p\pi_u^3 (9.06)$        |
| $2^3\Sigma^-_g$ | This work           | 0.9477  | 0.0917  | $3s\sigma_g^2 3s\sigma_u^2 3p\sigma_g^0 3p\pi_u^2 3p\pi_g^2 (83.1)$                                                                                                                                                           |
| $L^3\Pi_g$      | This work           | 13.5756 | 0.2332  | $3s\sigma_g^2 3s\sigma_u^2 3p\sigma_g^1 3p\pi_u^2 3p\pi_g^1 (53.3)$<br>$3s\sigma_g^2 3s\sigma_u^1 3p\sigma_g^2 3p\pi_u^3 (27.5)$                                                                                              |
|                 | Exp <sup>9</sup>    |         | 0.2370  |                                                                                                                                                                                                                               |
| $K^3\Sigma^-_u$ | This work           | 6.8736  | 0.2098  | $3s\sigma_g^2 3s\sigma_u^2 3p\sigma_g^0 3p\pi_u^3 3p\pi_g^1 (59.0)$<br>$3s\sigma_g^2 3s\sigma_u^2 3p\sigma_g^2 3p\pi_u^1 3p\pi_g^1 (15.8)$                                                                                    |
|                 | Exp <sup>10</sup>   | 5.95    | 0.2185  |                                                                                                                                                                                                                               |
| $3^3\Sigma^-_u$ | This work           | 6.9775  | 0.1267  | $3s\sigma_g^2 3s\sigma_u^2 3p\sigma_g^0 3p\pi_u^3 3p\pi_g^1 (34.2)$                                                                                                                                                           |

$$3s\sigma_g^2 3s\sigma_u^2 3p\sigma_g^1 3p\pi_u^2 3p\pi_g^0 3p\sigma_u^1 (29.7)$$

$$3s\sigma_g^2 3s\sigma_u^2 3p\sigma_g^1 3p\pi_u^0 3p\pi_g^2 3p\sigma_u^1 (7.3)$$

$$3s\sigma_g^2 3s\sigma_u^2 3p\sigma_g^2 3p\pi_u^1 3p\pi_g^1 (6.1)$$

$$3s\sigma_g^2 3s\sigma_u^2 3p\sigma_g^0 3p\pi_u^1 3p\pi_g^3 (5.7)$$

Table S3. Spectroscopic constants of the singlet  $\Lambda$ -S states for  $\text{Si}_2$

| State           |                   | $\omega_e \chi_e (\text{cm}^{-1})$ | $B_e (\text{cm}^{-1})$ | Configuration (%)                                                                                                                           |
|-----------------|-------------------|------------------------------------|------------------------|---------------------------------------------------------------------------------------------------------------------------------------------|
| $a^1\Delta_g$   | This work         | 1.7426                             | 0.2269                 | $3s\sigma_g^2 3s\sigma_u^2 3p\sigma_g^2 3p\pi_u^2 (81.7)$                                                                                   |
| $c^1\Sigma^+g$  | This work         | -3.4564                            | 0.2511                 | $3s\sigma_g^2 3s\sigma_u^2 3p\sigma_g^0 3p\pi_u^4 (41.2)$<br>$3s\sigma_g^2 3s\sigma_u^2 3p\sigma_g^2 3p\pi_u^2 (37.1)$                      |
| $b^1\Pi_u$      | This work         | 2.2267                             | 0.2517                 | $3s\sigma_g^2 3s\sigma_u^2 3p\sigma_g^1 3p\pi_u^3 (80.1)$                                                                                   |
|                 | Exp <sup>18</sup> | 2.6123                             | 0.2593                 |                                                                                                                                             |
| $d^1\Sigma^+g$  | This work         | 6.1160                             | 0.2457                 | $3s\sigma_g^2 3s\sigma_u^2 3p\sigma_g^2 3p\pi_u^2 (42.9)$<br>$3s\sigma_g^2 3s\sigma_u^2 3p\sigma_g^0 3p\pi_u^4 (31.5)$                      |
|                 | Exp <sup>18</sup> | 10.0232                            | 0.251823               |                                                                                                                                             |
| $e^1\Sigma^-_u$ | This work         | 2.0973                             | 0.1760                 | $3s\sigma_g^2 3s\sigma_u^2 3p\sigma_g^2 3p\pi_u^1 3p\pi_g^1 (83.4)$                                                                         |
| $f^1\Pi_g$      | This work         | 4.6496                             | 0.1951                 | $3s\sigma_g^2 3s\sigma_u^2 3p\sigma_g^1 3p\pi_u^2 3p\pi_g^1 (80.8)$                                                                         |
| $h^1\Phi_g$     | This work         | 2.0312                             | 0.1944                 | $3s\sigma_g^2 3s\sigma_u^2 3p\sigma_g^1 3p\pi_u^2 3p\pi_g^1 (83.4)$                                                                         |
| $g^1\Delta_u$   | This work         | 3.2751                             | 0.1717                 | $3s\sigma_g^2 3s\sigma_u^2 3p\sigma_g^0 3p\pi_u^3 3p\pi_g^1 (77.9)$                                                                         |
| $2^1\Pi_g$      | This work         | 2.5515                             | 0.1846                 | $3s\sigma_g^2 3s\sigma_u^2 3p\sigma_g^1 3p\pi_u^2 3p\pi_g^1 (74.65)$                                                                        |
| $2^1\Sigma^-_u$ | This work         | 3.4417                             | 0.2251                 | $3s\sigma_g^2 3s\sigma_u^2 3p\sigma_g^1 3p\pi_u^2 3p\pi_g^1 (79.6)$                                                                         |
| $2^1\Pi_u$      | This work         | 1.6952                             | 0.1204                 | $3s\sigma_g^2 3s\sigma_u^2 3p\sigma_g^1 3p\pi_u^1 3p\pi_g^2 (60.0)$<br>$3s\sigma_g^2 3s\sigma_u^2 3p\sigma_g^2 3p\pi_u^2 3p\pi_g^1 (22.61)$ |

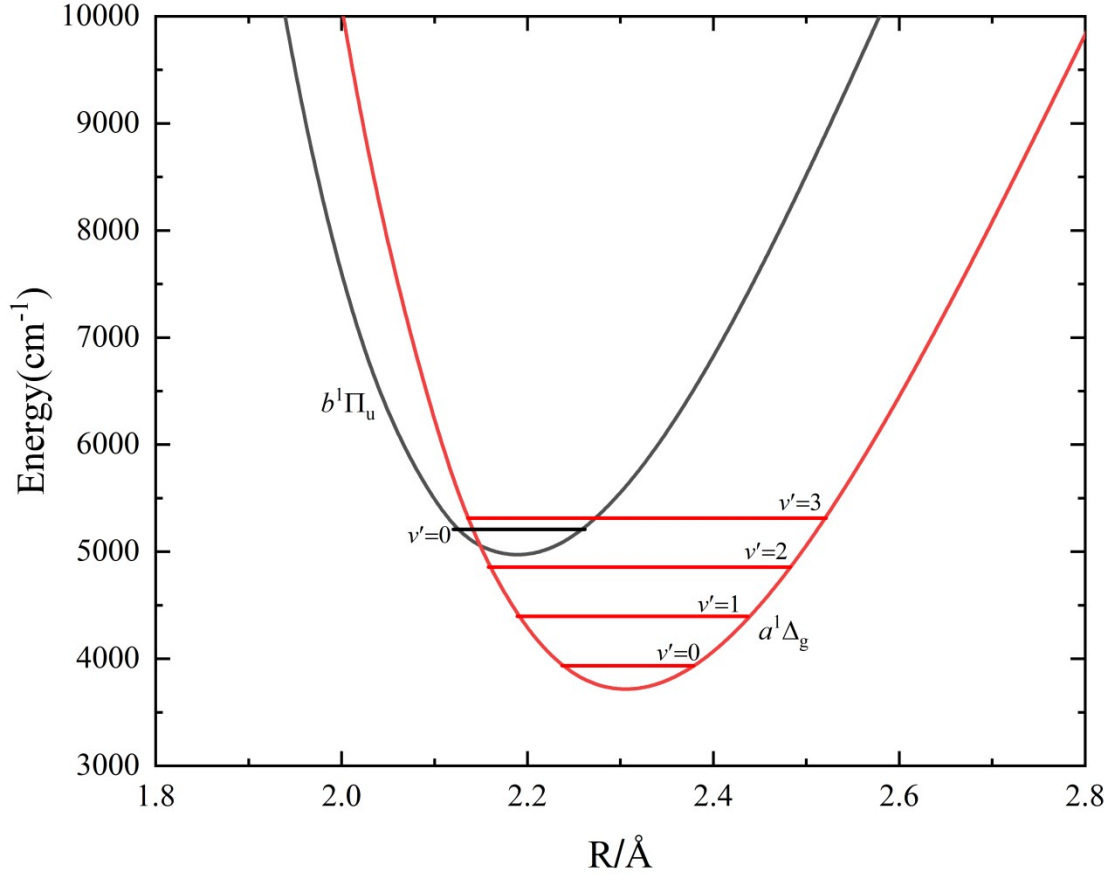

Figure S2. Potential energy curves with vibration energy level of  $a^1\Delta_g$  and  $b^1\Pi_u$  states.

Table S4. Spectroscopic constants of the quintet  $\Lambda$ -S states for  $\text{Si}_2$

| State           |           | $\omega_e\chi_e(\text{cm}^{-1})$ | $B_e(\text{cm}^{-1})$ | Configuration (%)                                                                |
|-----------------|-----------|----------------------------------|-----------------------|----------------------------------------------------------------------------------|
| $1^5\Pi_g$      | This work | 2.1239                           | 0.2046                | $3s\sigma_g^2 3s\sigma_u^2 3p\sigma_g^1 3p\pi_u^2 3p\pi_g^1$ (85.0)              |
| $1^5\Pi_u$      | This work | 1.7908                           | 0.0888                | $3s\sigma_g^2 3s\sigma_u^2 3p\sigma_g^1 3p\pi_u^1 3p\pi_g^2$ (62.9)              |
|                 |           |                                  |                       | $3s\sigma_g^2 3s\sigma_u^2 3p\sigma_g^0 3p\pi_u^2 3p\pi_g^1 3p\sigma_u^1$ (24.4) |
| $1^5\Sigma_g^+$ | This work |                                  |                       | $3s\sigma_g^2 3s\sigma_u^2 3p\sigma_g^1 3p\pi_u^1 3p\pi_g^1 3p\sigma_u^1$ (57.2) |
|                 |           |                                  |                       | $3s\sigma_g^2 3s\sigma_u^2 3p\sigma_g^0 3p\pi_u^2 3p\pi_g^2$ (30.4)              |
| $1^5\Sigma_u^-$ | This work |                                  |                       | $3s\sigma_g^2 3s\sigma_u^2 3p\sigma_g^1 3p\pi_u^2 3p\pi_g^0 3p\sigma_u^1$ (45.2) |
|                 |           |                                  |                       | $3s\sigma_g^2 3s\sigma_u^2 3p\sigma_g^1 3p\pi_u^0 3p\pi_g^2 3p\sigma_u^1$ (42.4) |
| $1^5\Delta_g$   | This work | 12.1457                          | 0.2576                | $3s\sigma_g^2 3s\sigma_u^1 3p\sigma_g^1 3p\pi_u^3 3p\pi_g^1$ (82.6)              |
| $2^5\Sigma_g^+$ | This work | 16.1514                          | 0.2190                | $3s\sigma_g^2 3s\sigma_u^1 3p\sigma_g^1 3p\pi_u^3 3p\pi_g^1$ (55.7)              |
|                 |           |                                  |                       | $3s\sigma_g^2 3s\sigma_u^2 3p\sigma_g^0 3p\pi_u^2 3p\pi_g^2$ (22.5)              |

Table S5. The electric dipole transition moment for the triplet-triplet transitions of Si<sub>2</sub>. (a.u.)

| R/Å  | $X^3\Sigma_g^-D^3\Pi_u$ | $X^3\Sigma_g^-2^3\Pi_u$ | $D^3\Pi_u-C^3\Pi_g$ | $D^3\Pi_u-2^3\Pi_g$    | $D^3\Pi_u-L^3\Pi_g$    | $D^3\Pi_u-3^3\Pi_g$    | $D^3\Pi_u-2^3\Sigma_g^-$ | $B^3\Delta_u-2^3\Pi_g$ |
|------|-------------------------|-------------------------|---------------------|------------------------|------------------------|------------------------|--------------------------|------------------------|
| 1.9  | 0.35200                 | 0.31871                 | 0.46150             | -0.13906               | 0.03532                | 0.03214                | 0.11584                  | -0.15817               |
| 1.95 | 0.34536                 | 0.31263                 | 0.36582             | -0.16371               | 0.04229                | 0.01811                | 0.08415                  | -0.13632               |
| 2    | 0.33711                 | 0.30372                 | 0.26993             | -0.18160               | 0.04591                | -0.00253               | 0.02736                  | -0.10013               |
| 2.05 | 0.32828                 | 0.29320                 | 0.17703             | -0.18510               | 0.04301                | -0.03229               | -0.04462                 | -0.03790               |
| 2.11 | 0.31659                 | 0.27887                 | 0.08089             | -0.16947               | 0.02252                | -0.08127               | -0.10447                 | 0.06511                |
| 2.15 | 0.30818                 | 0.26862                 | 0.02853             | -0.15230               | -0.00907               | -0.11823               | -0.12276                 | 0.11948                |
| 2.2  | 0.29746                 | 0.25552                 | -0.02570            | -0.12987               | -0.07322               | -0.15813               | -0.12967                 | 0.15730                |
| 2.25 | 0.28607                 | 0.24190                 | -0.07142            | -0.10859               | -0.15800               | -0.18562               | -0.12631                 | 0.17440                |
| 2.3  | 0.27568                 | 0.22802                 | -0.11047            | -0.09133               | -0.24751               | -0.20280               | -0.09711                 | 0.18074                |
| 2.35 | 0.26389                 | 0.21410                 | -0.14557            | -0.07720               | -0.33793               | -0.21666               | -0.08194                 | 0.18147                |
| 2.4  | 0.25188                 | 0.20016                 | -0.17798            | -0.06515               | -0.43163               | -0.23022               | -0.06184                 | 0.17883                |
| 2.45 | 0.23962                 | 0.18618                 | -0.20853            | -0.05444               | -0.52558               | -0.24380               | -0.04511                 | 0.17395                |
| 2.5  | 0.22760                 | 0.17244                 | -0.23790            | -0.04463               | -0.61757               | -0.25780               | -0.03315                 | 0.16779                |
| 2.55 | 0.21521                 | 0.15863                 | -0.26625            | -0.03492               | -0.70021               | -0.27189               | -0.02505                 | 0.16035                |
| 2.6  | 0.20290                 | 0.14466                 | -0.29376            | -0.02489               | -0.76493               | -0.28594               | -0.01936                 | 0.15219                |
| 2.65 | 0.19111                 | 0.13007                 | -0.32076            | -0.01363               | -0.80107               | -0.29955               | -0.01549                 | 0.14394                |
| 2.7  | 0.17916                 | 0.11064                 | -0.34631            | -0.00135               | -0.80764               | -0.31250               | -0.01222                 | 0.13495                |
| 2.75 | 0.16777                 | 0.07984                 | -0.37186            | 0.01396                | -0.78490               | -0.32382               | -0.00932                 | 0.12593                |
| 2.82 | 0.15275                 | 0.04389                 | -0.40731            | 0.03556                | -0.72625               | -0.33731               | -0.00581                 | 0.11395                |
| 2.84 | 0.14840                 | 0.03828                 | -0.41631            | 0.04147                | -0.70876               | -0.34068               | -0.00492                 | 0.11026                |
| 2.88 | 0.13995                 | 0.03046                 | -0.43303            | 0.05379                | -0.67296               | -0.34672               | -0.00339                 | 0.10291                |
| 2.9  | 0.13586                 | 0.02767                 | -0.44073            | 0.06024                | -0.65498               | -0.34937               | -0.00274                 | 0.09926                |
| 2.95 | 0.12600                 | 0.02259                 | -0.45794            | 0.07725                | -0.61058               | -0.35477               | -0.00146                 | 0.09026                |
| 3.01 | 0.11484                 | 0.01855                 | -0.47451            | 0.09919                | -0.55917               | -0.35874               | -0.00054                 | 0.07976                |
| 3.05 | 0.10779                 | 0.01655                 | -0.48291            | 0.11446                | -0.52622               | -0.35970               | -0.00026                 | 0.07298                |
| 3.1  | 0.09945                 | 0.01450                 | -0.49034            | 0.13375                | -0.48652               | -0.35887               | -0.00029                 | 0.06479                |
| R/Å  | $H^3\Sigma_u-2^3\Pi_g$  | $H^3\Sigma_u-C^3\Pi_g$  | R/Å                 | $K^3\Sigma_u-2^3\Pi_g$ | $K^3\Sigma_u-C^3\Pi_g$ | $K^3\Sigma_u-L^3\Pi_g$ | $3^3\Sigma_u-2^3\Pi_g$   | $3^3\Sigma_u-C^3\Pi_g$ |
| 1.9  | 0.05714                 | 0.29650                 | 1.9                 | 0.09648                | -0.30833               | -0.08684               | -0.48221                 | -0.16350               |
| 1.95 | 0.09679                 | 0.29452                 | 1.95                | -0.01866               | -0.34055               | -0.05319               | -0.47239                 | -0.05599               |
| 2    | 0.13412                 | 0.28778                 | 2                   | -0.09850               | -0.34425               | -0.03552               | -0.44497                 | 0.02864                |
| 2.05 | 0.16968                 | 0.27275                 | 2.05                | -0.16679               | -0.33326               | -0.02310               | -0.40855                 | 0.09817                |
| 2.11 | 0.18537                 | 0.25854                 | 2.11                | -0.23186               | -0.31046               | -0.00872               | -0.36189                 | 0.15314                |
| 2.15 | 0.19494                 | 0.23590                 | 2.15                | -0.26387               | -0.29509               | 0.00269                | -0.33476                 | 0.17109                |
| 2.2  | 0.18835                 | 0.20162                 | 2.2                 | -0.29355               | -0.27848               | 0.01810                | -0.30498                 | 0.18383                |
| 2.25 | 0.15333                 | 0.14657                 | 2.25                | -0.30906               | -0.25959               | 0.03489                | -0.28469                 | 0.17716                |
| 2.3  | 0.06914                 | 0.05234                 | 2.3                 | -0.30781               | -0.23499               | 0.04715                | -0.26706                 | 0.16360                |
| 2.35 | -0.02646                | -0.03937                | 2.35                | -0.29484               | -0.20879               | 0.05504                | -0.25037                 | 0.14739                |
| 2.4  | -0.07577                | -0.08083                | 2.4                 | -0.27860               | -0.18597               | 0.06151                | -0.23432                 | 0.13111                |
| 2.45 | -0.09670                | -0.09496                | 2.45                | -0.26268               | -0.16722               | 0.06803                | -0.21928                 | 0.11609                |
| 2.5  | -0.10387                | -0.09639                | 2.5                 | -0.24767               | -0.15162               | 0.07486                | -0.20563                 | 0.10286                |
| 2.55 | -0.10525                | -0.09276                | 2.55                | -0.23341               | -0.13823               | 0.08165                | -0.19364                 | 0.09148                |
| 2.6  | -0.10334                | -0.08668                | 2.6                 | -0.21965               | -0.12644               | 0.08745                | -0.18339                 | 0.08181                |

| 2.65 | -0.10073                 | -0.07966                      | 2.65                     | -0.20617                 | -0.11592                 | 0.09080                  | -0.17483                      | 0.07356 |
|------|--------------------------|-------------------------------|--------------------------|--------------------------|--------------------------|--------------------------|-------------------------------|---------|
| 2.7  | -0.09850                 | -0.07281                      | 2.7                      | -0.19270                 | -0.10651                 | 0.09035                  | -0.16783                      | 0.06642 |
| 2.75 | -0.09568                 | -0.06656                      | 2.75                     | -0.17889                 | -0.09806                 | 0.08596                  | -0.16218                      | 0.06019 |
| 2.8  | -0.09208                 | -0.06136                      | 2.79                     | -0.16737                 | -0.09191                 | 0.08014                  | -0.15858                      | 0.05571 |
| 2.82 | -0.09050                 | -0.05823                      | 2.82                     | -0.15833                 | -0.08766                 | 0.07470                  | -0.15641                      | 0.05257 |
| 2.84 | -0.08890                 | -0.05512                      | 2.84                     | -0.15206                 | -0.08500                 | 0.07061                  | -0.15522                      | 0.05054 |
| 2.86 | -0.08726                 | -0.05205                      | 2.88                     | -0.13878                 | -0.08014                 | 0.06136                  | -0.15349                      | 0.04653 |
| 2.88 | -0.08559                 | -0.04902                      | 2.9                      | -0.13168                 | -0.07796                 | 0.05616                  | -0.15294                      | 0.04450 |
| 2.9  | -0.08130                 | -0.04173                      | 2.95                     | -0.11225                 | -0.07331                 | 0.04128                  | -0.15237                      | 0.03915 |
| 2.95 | -0.07593                 | -0.03371                      | 3.01                     | -0.08525                 | -0.06922                 | 0.01956                  | -0.15234                      | 0.03185 |
| 3    | -0.07224                 | -0.02890                      | 3.05                     | -0.06555                 | -0.06715                 | 0.00332                  | -0.15145                      | 0.02649 |
| 3.05 | -0.06755                 | -0.02359                      | 3.1                      | -0.04157                 | -0.06476                 | -0.01667                 | -0.14769                      | 0.01998 |
| 3.1  | -0.06284                 | -0.01905                      | 3.2                      | -0.00766                 | -0.05933                 | -0.04550                 | -0.13134                      | 0.01105 |
| R/Å  | $B^3\Delta_u-E^3\Phi_g$  | $B^3\Delta_u-3^3\Pi_g$        | $B^3\Delta_u-L^3\Pi_g$   | $A^3\Sigma^+_u-2^3\Pi_g$ | $A^3\Sigma^+_u-L^3\Pi_g$ | $A^3\Sigma^+_u-3^3\Pi_g$ | $X^3\Sigma^-_g-H^3\Sigma^-_u$ |         |
| 1.9  | 0.15689                  | 0.12253                       | -0.18413                 | -0.23403                 | 0.10138                  | -0.03625                 | -0.25290                      |         |
| 1.95 | 0.13459                  | 0.08798                       | -0.19284                 | -0.25010                 | 0.10017                  | -0.04226                 | -0.26130                      |         |
| 2    | 0.09804                  | 0.03968                       | -0.20305                 | -0.25638                 | 0.09798                  | -0.04949                 | -0.27099                      |         |
| 2.05 | 0.02568                  | -0.03679                      | -0.21255                 | -0.24806                 | 0.09694                  | -0.05731                 | -0.28218                      |         |
| 2.11 | -0.06595                 | -0.11273                      | -0.20305                 | -0.22122                 | 0.09605                  | -0.06845                 | -0.30236                      |         |
| 2.15 | -0.12110                 | -0.15377                      | -0.17645                 | -0.19593                 | 0.09414                  | -0.08116                 | -0.32580                      |         |
| 2.2  | -0.15964                 | -0.18059                      | -0.13490                 | -0.15581                 | 0.09015                  | -0.10421                 | -0.37864                      |         |
| 2.25 | -0.17708                 | -0.18709                      | -0.10096                 | -0.09977                 | 0.08868                  | -0.13302                 | -0.48271                      |         |
| 2.3  | -0.18363                 | -0.18288                      | -0.08073                 | -0.02407                 | 0.09223                  | -0.16589                 | -0.64102                      |         |
| 2.35 | -0.18458                 | -0.17432                      | -0.06988                 | 0.05615                  | 0.09350                  | -0.19301                 | -0.78702                      |         |
| 2.4  | -0.18211                 | -0.16417                      | -0.06411                 | 0.11104                  | 0.06499                  | -0.20503                 | -0.86302                      |         |
| 2.45 | -0.17731                 | -0.15328                      | -0.06076                 | 0.13735                  | 0.06146                  | -0.20567                 | -0.88505                      |         |
| 2.5  | -0.17119                 | -0.14241                      | -0.05751                 | 0.14680                  | 0.05808                  | -0.20103                 | -0.88672                      |         |
| 2.55 | -0.16370                 | -0.13125                      | -0.05313                 | 0.14668                  | 0.05367                  | -0.19326                 | -0.87686                      |         |
| 2.6  | -0.15541                 | -0.12019                      | -0.04654                 | 0.14149                  | 0.04722                  | -0.18393                 | -0.86198                      |         |
| 2.65 | -0.14697                 | -0.10973                      | -0.03793                 | 0.13371                  | 0.03886                  | -0.17430                 | -0.84099                      |         |
| 2.7  | -0.13773                 | -0.09904                      | -0.02712                 | 0.12396                  | 0.02828                  | -0.16329                 | -0.82096                      |         |
| 2.75 | -0.12850                 | -0.08875                      | -0.01565                 | 0.11356                  | 0.01687                  | -0.15203                 | -0.79568                      |         |
| 2.79 | -0.12084                 | -0.08054                      | -0.00736                 | 0.10466                  | 0.00853                  | -0.14250                 | -0.77782                      |         |
| 2.82 | -0.11633                 | -0.07579                      | -0.00317                 | 0.09884                  | 0.00420                  | -0.13724                 | -0.76036                      |         |
| 2.84 | -0.11258                 | -0.07189                      | 0.00014                  | 0.09434                  | -0.00082                 | -0.13248                 | -0.75120                      |         |
| 2.88 | -0.10512                 | -0.06428                      | 0.00607                  | 0.08539                  | -0.00526                 | -0.12290                 | -0.73253                      |         |
| 2.9  | -0.10142                 | -0.06058                      | 0.00872                  | 0.08096                  | -0.00798                 | -0.11811                 | -0.72303                      |         |
| 2.95 | -0.09232                 | -0.05167                      | 0.01453                  | 0.07012                  | -0.01397                 | -0.10615                 | -0.69882                      |         |
| 3.01 | -0.08171                 | -0.04168                      | 0.02023                  | 0.05775                  | -0.01988                 | -0.09200                 | -0.66893                      |         |
| 3.05 | -0.07486                 | -0.03548                      | 0.02341                  | 0.05003                  | -0.02317                 | -0.08277                 | -0.64850                      |         |
| 3.1  | -0.06660                 | -0.02830                      | 0.02682                  | 0.04108                  | -0.02670                 | -0.07154                 | -0.62239                      |         |
| R/Å  | $2^3\Sigma^-_g-2^3\Pi_u$ | $2^3\Sigma^-_g-H^3\Sigma^-_u$ | $3^3\Pi_g-2^3\Sigma^+_u$ | $L^3\Pi_g-2^3\Sigma^+_u$ | $L^3\Pi_g-2^3\Delta_u$   | $2^3\Delta_u-2^3\Pi_g$   | $2^3\Pi_u-C^3\Pi_g$           |         |
| 1.9  | 0.30629                  | -0.00308                      | 0.14264                  | 0.05409                  | -0.20628                 | 0.47970                  | -0.41893                      |         |
| 1.95 | 0.31892                  | 0.07504                       | 0.08885                  | 0.11199                  | -0.15895                 | 0.36925                  | -0.38750                      |         |

|                |                          |                       |                       |                            |                          |                             |                          |
|----------------|--------------------------|-----------------------|-----------------------|----------------------------|--------------------------|-----------------------------|--------------------------|
| 2              | 0.31779                  | 0.14077               | -0.06096              | 0.35185                    | -0.07592                 | 0.27782                     | -0.33119                 |
| 2.05           | 0.29921                  | 0.17814               | -0.14030              | 0.37828                    | -0.03817                 | 0.19988                     | -0.24348                 |
| 2.11           | 0.28286                  | 0.18213               | -0.19765              | 0.34757                    | 0.07590                  | 0.16616                     | -0.17656                 |
| 2.15           | 0.26157                  | 0.17059               | -0.24968              | 0.29655                    | 0.08431                  | 0.14143                     | -0.08612                 |
| 2.2            | 0.23854                  | 0.13723               | -0.27566              | 0.24817                    | 0.07312                  | 0.13192                     | -0.01182                 |
| 2.25           | 0.21070                  | 0.06638               | -0.28433              | 0.20706                    | 0.05729                  | 0.13269                     | 0.10322                  |
| 2.3            | 0.17537                  | -0.08826              | -0.27858              | 0.17283                    | 0.04064                  | 0.14222                     | 0.19149                  |
| 2.35           | 0.12647                  | -0.32083              | -0.25458              | 0.14400                    | 0.02518                  | 0.15396                     | 0.27322                  |
| 2.4            | 0.06262                  | -0.56482              | -0.20806              | 0.11889                    | 0.01089                  | 0.16706                     | 0.34857                  |
| 2.45           | 0.01170                  | -0.81948              | -0.14704              | 0.09853                    | -0.00238                 | 0.17843                     | 0.41973                  |
| 2.5            | -0.07013                 | -1.00373              | -0.09879              | 0.08626                    | -0.01482                 | 0.18382                     | 0.48462                  |
| 2.55           | -0.10236                 | -1.10866              | -0.06826              | 0.08039                    | -0.02629                 | 0.17425                     | 0.54536                  |
| 2.6            | -0.11045                 | -1.15111              | -0.04995              | 0.07663                    | -0.03593                 | 0.13185                     | 0.60575                  |
| 2.65           | -0.08995                 | -1.16847              | -0.03817              | 0.07389                    | -0.04375                 | -0.00504                    | 0.65818                  |
| 2.7            | -0.03221                 | -1.15751              | -0.02997              | 0.07052                    | -0.04933                 | -0.26964                    | 0.65265                  |
| 2.75           | 0.01192                  | -1.14858              | -0.02558              | 0.06688                    | -0.05165                 | -0.42744                    | 0.59424                  |
| 2.8            | 0.03366                  | -1.13091              | -0.02332              | 0.06152                    | -0.05064                 | -0.49045                    | 0.54586                  |
| 2.82           | 0.04224                  | -1.12287              | -0.02193              | 0.05929                    | -0.05080                 | -0.50448                    | 0.52355                  |
| 2.84           | 0.04839                  | -1.11401              | -0.02071              | 0.05705                    | -0.05078                 | -0.50905                    | 0.50507                  |
| 2.86           | 0.05284                  | -1.10440              | -0.01964              | 0.05483                    | -0.05060                 | -0.50741                    | 0.48944                  |
| 2.88           | 0.05605                  | -1.09415              | -0.01868              | 0.05263                    | -0.05029                 | -0.50165                    | 0.47585                  |
| 2.9            | 0.06063                  | -1.06608              | -0.01669              | 0.04733                    | -0.04909                 | -0.47706                    | 0.44703                  |
| 2.95           | 0.06232                  | -1.02871              | -0.01483              | 0.04141                    | -0.04703                 | -0.43979                    | 0.41603                  |
| 3              | 0.06214                  | -1.00205              | -0.01379              | 0.03777                    | -0.04538                 | -0.41456                    | 0.39518                  |
| 3.05           | 0.06101                  | -0.96722              | -0.01262              | 0.03358                    | -0.04309                 | -0.38512                    | 0.36776                  |
| 3.1            | 0.05919                  | -0.93115              | -0.01154              | 0.02977                    | -0.04057                 | -0.35932                    | 0.33855                  |
| $R/\text{\AA}$ | $a^1\Delta_g - b^1\Pi_u$ | $b^1\Pi_u - f^1\Pi_g$ | $b^1\Pi_u - 2^1\Pi_g$ | $c^1\Sigma_g^+ - b^1\Pi_u$ | $a^1\Delta_g - 2^1\Pi_u$ | $a^1\Delta_g - g^1\Delta_u$ | $a^1\Delta_g - 2^1\Pi_u$ |
| 1.85           | -0.37156                 | 0.58243               | 0.00277               | -0.37325                   | -0.00119                 | -0.20269                    | 0.26424                  |
| 1.90           | -0.36607                 | 0.50752               | -0.00129              | -0.35295                   | -0.01355                 | -0.20706                    | 0.25220                  |
| 1.95           | -0.35996                 | 0.44156               | -0.00244              | -0.32837                   | -0.02473                 | -0.20935                    | 0.23656                  |
| 2.00           | -0.35165                 | 0.39056               | -0.00274              | -0.29744                   | -0.00488                 | -0.21788                    | 0.38512                  |
| 2.05           | -0.34343                 | 0.35277               | -0.00296              | -0.25599                   | -0.00527                 | -0.22836                    | 0.36345                  |
| 2.11           | -0.33207                 | 0.32198               | -0.00288              | -0.19092                   | -0.00583                 | -0.24769                    | 0.33829                  |
| 2.15           | -0.32386                 | 0.30866               | -0.00271              | -0.13729                   | -0.00640                 | -0.26634                    | 0.32225                  |
| 2.20           | -0.31382                 | 0.30052               | -0.00250              | -0.06480                   | -0.11606                 | -0.30022                    | 0.06772                  |
| 2.25           | -0.30250                 | 0.29527               | -0.00216              | 0.00233                    | -0.09199                 | -0.35332                    | 0.06751                  |
| 2.30           | -0.29088                 | 0.29558               | -0.00181              | 0.05321                    | -0.07182                 | -0.42413                    | 0.06471                  |
| 2.35           | -0.27893                 | 0.29935               | -0.00143              | 0.08803                    | -0.05473                 | -0.50758                    | 0.06031                  |
| 2.40           | -0.26641                 | 0.30594               | -0.00106              | 0.10996                    | -0.04122                 | -0.58135                    | 0.05580                  |
| 2.45           | -0.25350                 | 0.31452               | 0.00070               | 0.12346                    | -0.03009                 | -0.62642                    | 0.05142                  |
| 2.50           | -0.24076                 | 0.32498               | 0.00034               | 0.12955                    | -0.02137                 | -0.64645                    | 0.04780                  |
| 2.55           | -0.22756                 | 0.33667               | 0.00001               | 0.13104                    | -0.01444                 | -0.64585                    | 0.04471                  |
| 2.60           | -0.21438                 | 0.34943               | 0.00035               | 0.12952                    | -0.00882                 | -0.63350                    | 0.04209                  |
| 2.65           | -0.20172                 | 0.36262               | 0.00057               | 0.12624                    | -0.00414                 | -0.61045                    | 0.03994                  |



|      |          |         |         |         |         |          |         |
|------|----------|---------|---------|---------|---------|----------|---------|
| 2.70 | -0.18883 | 0.37638 | 0.00080 | 0.12114 | 0.00043 | -0.58619 | 0.03799 |
| 2.75 | -0.17650 | 0.38916 | 0.00084 | 0.11527 | 0.00260 | -0.55484 | 0.03629 |
| 2.80 | -0.16409 | 0.40248 | 0.00091 | 0.10891 | 0.00496 | -0.52592 | 0.03488 |
| 2.82 | -0.16033 | 0.40721 | 0.00085 | 0.10678 | 0.00586 | -0.50983 | 0.03437 |
| 2.84 | -0.15559 | 0.41223 | 0.00086 | 0.10387 | 0.00658 | -0.49799 | 0.03380 |
| 2.86 | -0.15092 | 0.41708 | 0.00086 | 0.10092 | 0.00722 | -0.48603 | 0.03323 |
| 2.88 | -0.14632 | 0.42174 | 0.00087 | 0.09794 | 0.00778 | -0.47398 | 0.03267 |
| 2.90 | -0.14179 | 0.42618 | 0.00086 | 0.09495 | 0.00827 | -0.46186 | 0.03210 |
| 2.95 | -0.13078 | 0.43617 | 0.00083 | 0.08744 | 0.00917 | -0.43140 | 0.03065 |
| 3.00 | -0.12028 | 0.44427 | 0.00079 | 0.08000 | 0.00966 | -0.40091 | 0.02914 |

| R/Å  | $1^5\Pi_g-1^5\Pi_u$ | R/Å   | $K^3\Sigma_u-X^3\Sigma_g$ | $3^3\Sigma_u-X^3\Sigma_g$ | R/Å   | $2^3\Sigma_g-3^3\Sigma_u$ |
|------|---------------------|-------|---------------------------|---------------------------|-------|---------------------------|
| 1.85 | 0.82990             | 1.9   | -0.36251                  | 1.58827                   | 1.9   | 0.04723                   |
| 1.9  | 0.73820             | 1.95  | -0.79922                  | 1.52428                   | 1.95  | 0.03513                   |
| 1.95 | 0.62870             | 2     | -0.93344                  | 1.47357                   | 2     | 0.02817                   |
| 2    | 0.51248             | 2.05  | -0.97401                  | 1.42181                   | 2.05  | 0.02225                   |
| 2.05 | 0.38670             | 2.11  | -0.96466                  | 1.32919                   | 2.11  | 0.02416                   |
| 2.11 | 0.22826             | 2.15  | -0.93295                  | 1.23909                   | 2.15  | 0.03009                   |
| 2.15 | 0.12002             | 2.2   | -0.87283                  | 1.13816                   | 2.2   | 0.01908                   |
| 2.2  | 0.01621             | 2.25  | -0.75896                  | 0.97121                   | 2.25  | -0.00006                  |
| 2.25 | 0.15182             | 2.3   | -0.61764                  | 0.79704                   | 2.3   | -0.02295                  |
| 2.3  | 0.28082             | 2.35  | -0.49287                  | 0.63775                   | 2.35  | -0.07833                  |
| 2.35 | 0.40173             | 2.4   | -0.40863                  | 0.50540                   | 2.4   | -0.10523                  |
| 2.4  | 0.51244             | 2.45  | -0.35930                  | 0.40199                   | 2.45  | -0.11308                  |
| 2.45 | 0.61075             | 2.5   | -0.33298                  | 0.32408                   | 2.5   | -0.11317                  |
| 2.5  | 0.69636             | 2.55  | -0.32068                  | 0.26671                   | 2.55  | -0.11078                  |
| 2.55 | 0.76815             | 2.6   | -0.31665                  | 0.22532                   | 2.601 | -0.11101                  |
| 2.6  | 0.82662             | 2.65  | -0.31724                  | 0.19635                   | 2.65  | -0.11333                  |
| 2.65 | 0.87245             | 2.7   | -0.32009                  | 0.17725                   | 2.7   | -0.11832                  |
| 2.7  | 0.90630             | 2.75  | -0.32352                  | 0.16638                   | 2.75  | -0.12609                  |
| 2.75 | 0.92894             | 2.792 | -0.32585                  | 0.16297                   | 2.79  | -0.13488                  |
| 2.8  | 0.94229             | 2.851 | -0.32669                  | 0.16676                   | 2.821 | -0.14400                  |
| 2.82 | 0.94521             | 2.9   | -0.32355                  | 0.17794                   | 2.84  | -0.15247                  |
| 2.84 | 0.94669             | 2.95  | -0.31451                  | 0.19763                   | 2.881 | -0.17016                  |
| 2.86 | 0.94695             | 3.01  | -0.29194                  | 0.23212                   | 2.9   | -0.18001                  |
| 2.88 | 0.94606             | 3.05  | -0.26823                  | 0.25929                   | 2.95  | -0.21168                  |
| 2.9  | 0.94409             | 3.1   | -0.23086                  | 0.29164                   | 3.01  | -0.26054                  |
| 2.95 | 0.93482             | 3.15  | -0.19154                  | 0.31578                   | 3.05  | -0.29691                  |
| 3    | 0.92010             | 3.2   | -0.15688                  | 0.32966                   | 3.1   | -0.33978                  |

| R/Å  | $2^1\Pi_g - e^1\Sigma_u$ | $h^1\Phi_g - g^1\Delta_u$ | $f^1\Pi_g - g^1\Delta_u$ | $f^1\Pi_g - 2^1\Pi_u$ | $d^1\Sigma_g^+ - 2^1\Pi_u$ | $f^1\Pi_g - e^1\Sigma_u$ |
|------|--------------------------|---------------------------|--------------------------|-----------------------|----------------------------|--------------------------|
| 2.15 | -0.16886                 | 0.04152                   | 0.34242                  | -0.52652              | 0.10717                    | -0.49155                 |
| 2.2  | -0.15001                 | 0.03001                   | 0.33119                  | -0.66723              | 0.06985                    | -0.47981                 |
| 2.25 | -0.13293                 | 0.02500                   | 0.31684                  | -0.76911              | 0.03200                    | -0.46549                 |
| 2.3  | -0.11555                 | 0.02807                   | 0.29805                  | -0.84071              | 0.00176                    | -0.44934                 |
| 2.35 | -0.09917                 | 0.04156                   | 0.27127                  | -0.88492              | -0.02607                   | -0.43107                 |

---

|      |          |         |         |          |          |          |
|------|----------|---------|---------|----------|----------|----------|
| 2.4  | -0.08342 | 0.06332 | 0.23422 | -0.90627 | -0.04189 | -0.41041 |
| 2.45 | -0.06830 | 0.09021 | 0.18734 | -0.91169 | -0.05170 | -0.38983 |
| 2.5  | -0.05381 | 0.10993 | 0.13952 | -0.90221 | -0.05758 | -0.36663 |
| 2.55 | -0.04006 | 0.11873 | 0.10059 | -0.88145 | -0.06091 | -0.34278 |
| 2.6  | -0.02731 | 0.12068 | 0.07416 | -0.84917 | -0.06182 | -0.32112 |
| 2.65 | -0.01522 | 0.11397 | 0.05548 | -0.81136 | -0.06227 | -0.29690 |
| 2.7  | -0.00446 | 0.10464 | 0.04232 | -0.76374 | -0.06209 | -0.27437 |
| 2.75 | 0.00373  | 0.09555 | 0.03502 | -0.72544 | -0.06134 | -0.25548 |
| 2.8  | 0.00914  | 0.09451 | 0.03395 | -0.69566 | -0.05856 | -0.24680 |
| 2.82 | 0.01281  | 0.08990 | 0.03161 | -0.67498 | -0.05780 | -0.23789 |
| 2.84 | 0.01630  | 0.08529 | 0.02953 | -0.65398 | -0.05697 | -0.22912 |
| 2.86 | 0.01960  | 0.08071 | 0.02769 | -0.63274 | -0.05608 | -0.22051 |
| 2.88 | 0.02271  | 0.07619 | 0.02603 | -0.61133 | -0.05513 | -0.21206 |
| 2.9  | 0.02965  | 0.06527 | 0.02252 | -0.55753 | -0.05256 | -0.19174 |
| 2.95 | 0.03540  | 0.05503 | 0.01965 | -0.50414 | -0.04977 | -0.17263 |
| 3    | 0.03997  | 0.04561 | 0.01719 | -0.45208 | -0.04683 | -0.15483 |
| 3.05 | 0.04340  | 0.03708 | 0.01501 | -0.40212 | -0.04382 | -0.13838 |
| 3.1  | 0.04578  | 0.02945 | 0.01303 | -0.35489 | -0.04081 | -0.12329 |

---

Table S6. The transition dipole moment  $\langle \Psi_v | er | \Psi_{v''} \rangle$  ( $TDM_{v,v''}$ ), oscillator strength  $f$  and the Einstein spontaneous emission coefficient  $A$  for the  $v'-v''$  band of allowed electronic transitions for Si<sub>2</sub>.

| $v''$                      | $TDM_{0,v''}$ (a.u.) | $f_{0,v''}$ | $A_{0,v''}$ (s <sup>-1</sup> ) |
|----------------------------|----------------------|-------------|--------------------------------|
| $c^1\Sigma_g^+ - b^1\Pi_u$ |                      |             |                                |
| 0                          | 0.074248             | 1.28E-05    | 1.2386                         |
| $c^1\Sigma_g^+ - 2^1\Pi_u$ |                      |             |                                |
| 26                         | 0.002725             | 9.32E-07    | 265.5132                       |
| 27                         | 0.00353              | 1.54E-06    | 424.0484                       |
| 28                         | 0.004402             | 2.35E-06    | 627.5400                       |
| 29                         | 0.005292             | 3.34E-06    | 862.4196                       |
| 30                         | 0.006143             | 4.43E-06    | 1105.1684                      |
| 31                         | 0.006853             | 5.42E-06    | 1307.4132                      |
| 32                         | 0.007372             | 6.17E-06    | 1437.5712                      |
| 33                         | 0.007616             | 6.47E-06    | 1457.4766                      |
| 34                         | 0.007558             | 6.27E-06    | 1363.5102                      |
| 35                         | 0.007193             | 5.58E-06    | 1172.6314                      |
| 36                         | 0.006553             | 4.55E-06    | 923.7964                       |
| 37                         | 0.005707             | 3.39E-06    | 664.9790                       |
| 38                         | 0.004737             | 2.30E-06    | 434.8058                       |
| 39                         | 0.003741             | 1.41E-06    | 257.2822                       |
| 40                         | 0.002801             | 7.75E-07    | 136.7852                       |
| $b^1\Pi_u - f^1\Pi_g$      |                      |             |                                |
| 2                          | 0.04226              | 7.59E-05    | 9914.9837                      |
| 3                          | 0.068906             | 1.95E-04    | 23610.7087                     |
| 4                          | 0.096044             | 3.64E-04    | 40946.7023                     |
| 5                          | 0.118315             | 5.31E-04    | 55283.4776                     |
| 6                          | 0.131033             | 6.26E-04    | 60116.7523                     |
| 7                          | 0.13226              | 6.12E-04    | 54094.5062                     |
| 8                          | 0.122922             | 5.06E-04    | 41100.8084                     |
| 9                          | 0.105878             | 3.59E-04    | 26706.0229                     |
| 10                         | 0.084902             | 2.21E-04    | 14969.1703                     |
| 11                         | 0.063608             | 1.18E-04    | 7287.0309                      |
| 12                         | 0.044676             | 5.55E-05    | 3100.6481                      |
| $b^1\Pi_u - 2^1\Pi_g$      |                      |             |                                |
| 2                          | 0.09898              | 5.55E-04    | 128810.0705                    |
| 3                          | 0.177142             | 1.73E-03    | 379986.5199                    |
| 4                          | 0.265474             | 3.78E-03    | 784671.9145                    |
| 5                          | 0.344187             | 6.17E-03    | 1210779.2940                   |
| 6                          | 0.392453             | 7.79E-03    | 1442714.1909                   |
| 7                          | 0.398689             | 7.81E-03    | 1362214.7288                   |
| 8                          | 0.364274             | 6.32E-03    | 1038534.2360                   |

|                             |          |          |              |
|-----------------------------|----------|----------|--------------|
| 9                           | 0.301017 | 4.19E-03 | 646428.8001  |
| 10                          | 0.225702 | 2.28E-03 | 330621.1606  |
| 11                          | 0.153833 | 1.03E-03 | 139438.9758  |
| 12                          | 0.095409 | 3.82E-04 | 48590.2802   |
| $b^1\Pi_u - d^1\Sigma_g^+$  |          |          |              |
| 0                           | 0.45384  | 5.24E-03 | 61148.3994   |
| 1                           | 0.12803  | 3.66E-04 | 3288.9584    |
| $a^1\Delta_g - b^1\Pi_u$    |          |          |              |
| 0                           | 0.152937 | 9.05E-05 | 97.9263      |
| 1                           | 0.012159 | 3.65E-07 | 0.1608       |
| $a^1\Delta_g - 2^1\Pi_u$    |          |          |              |
| 23                          | 0.003761 | 9.12E-07 | 273.8121     |
| 24                          | 0.004712 | 1.41E-06 | 407.6119     |
| 25                          | 0.005666 | 2.00E-06 | 558.6963     |
| 26                          | 0.006564 | 2.63E-06 | 710.7926     |
| 27                          | 0.007292 | 3.19E-06 | 831.2889     |
| 28                          | 0.007784 | 3.57E-06 | 897.3506     |
| 29                          | 0.007965 | 3.67E-06 | 889.7909     |
| 30                          | 0.007804 | 3.46E-06 | 808.7306     |
| 31                          | 0.007314 | 2.99E-06 | 672.3060     |
| 32                          | 0.006538 | 2.34E-06 | 508.4341     |
| 33                          | 0.005567 | 1.67E-06 | 348.7647     |
| 34                          | 0.004499 | 1.07E-06 | 215.4351     |
| 35                          | 0.003441 | 6.14E-07 | 119.2033     |
| 36                          | 0.00248  | 3.13E-07 | 58.5582      |
| 37                          | 0.001676 | 1.40E-07 | 25.2928      |
| $a^1\Delta_g - g^1\Delta_u$ |          |          |              |
| 3                           | 0.103864 | 8.00E-04 | 318561.0781  |
| 4                           | 0.151372 | 1.67E-03 | 639726.5991  |
| 5                           | 0.195702 | 2.74E-03 | 1010301.7219 |
| 6                           | 0.228267 | 3.65E-03 | 1297896.7169 |
| 7                           | 0.242848 | 4.06E-03 | 1386243.6343 |
| 8                           | 0.238096 | 3.82E-03 | 1256648.3471 |
| 9                           | 0.216511 | 3.10E-03 | 979387.0456  |
| 10                          | 0.183058 | 2.17E-03 | 659461.1174  |
| 11                          | 0.144532 | 1.33E-03 | 386943.6033  |
| 12                          | 0.107257 | 7.16E-04 | 200447.8659  |
| 13                          | 0.07478  | 3.41E-04 | 91612.6186   |
| $D^3\Pi_u - C^3\Pi_g$       |          |          |              |
| 1                           | 0.019658 | 1.75E-05 | 2585.4367    |
| 2                           | 0.039269 | 6.73E-05 | 9276.8799    |

|                          |          |          |             |
|--------------------------|----------|----------|-------------|
| 3                        | 0.061222 | 1.58E-04 | 20214.5385  |
| 4                        | 0.079481 | 2.56E-04 | 30445.3800  |
| 5                        | 0.089092 | 3.10E-04 | 34066.3091  |
| 6                        | 0.088033 | 2.91E-04 | 29515.0651  |
| 7                        | 0.077789 | 2.18E-04 | 20371.0543  |
| 8                        | 0.062132 | 1.33E-04 | 11439.9897  |
| 9                        | 0.045185 | 6.74E-05 | 5302.1235   |
| 10                       | 0.030057 | 2.85E-05 | 2046.1476   |
| $D^3\Pi_u - 2^3\Pi_g$    |          |          |             |
| 1                        | 0.011734 | 7.60E-06 | 1672.5606   |
| 2                        | 0.018713 | 1.88E-05 | 3899.9834   |
| 3                        | 0.023955 | 2.99E-05 | 5848.5011   |
| 4                        | 0.02606  | 3.43E-05 | 6321.8399   |
| 5                        | 0.024839 | 3.02E-05 | 5234.5181   |
| 6                        | 0.021076 | 2.11E-05 | 3427.7326   |
| 7                        | 0.016081 | 1.19E-05 | 1810.9604   |
| 8                        | 0.011097 | 5.47E-06 | 780.7426    |
| 9                        | 0.006921 | 2.06E-06 | 274.2520    |
| 10                       | 0.003864 | 6.19E-07 | 76.9858     |
| $D^3\Pi_u - 2^3\Sigma_g$ |          |          |             |
| 48                       | 0.001018 | 5.52E-08 | 2.8358      |
| 49                       | 0.001497 | 1.16E-07 | 5.5526      |
| 50                       | 0.002117 | 2.24E-07 | 10.0418     |
| 51                       | 0.00287  | 3.97E-07 | 16.6836     |
| 52                       | 0.003718 | 6.44E-07 | 25.2806     |
| 53                       | 0.005811 | 1.52E-06 | 55.7566     |
| 54                       | 0.005328 | 1.24E-06 | 42.3140     |
| 55                       | 0.005811 | 1.42E-06 | 45.4420     |
| 56                       | 0.005874 | 1.40E-06 | 41.9360     |
| 57                       | 0.005418 | 1.15E-06 | 32.2486     |
| 58                       | 0.004463 | 7.56E-07 | 19.7090     |
| $D^3\Pi_u - 3^3\Pi_g$    |          |          |             |
| 3                        | 0.03844  | 1.02E-04 | 35111.5607  |
| 4                        | 0.058289 | 2.29E-04 | 75418.1764  |
| 5                        | 0.077994 | 4.01E-04 | 126008.9031 |
| 6                        | 0.093825 | 5.67E-04 | 170002.3660 |
| 7                        | 0.102813 | 6.65E-04 | 190108.0411 |
| 8                        | 0.103647 | 6.60E-04 | 179730.6590 |
| 9                        | 0.096783 | 5.61E-04 | 145619.3684 |
| 10                       | 0.084095 | 4.13E-04 | 102042.1316 |
| 11                       | 0.06822  | 2.65E-04 | 62251.1510  |

|                                 |          |          |              |
|---------------------------------|----------|----------|--------------|
| 12                              | 0.051825 | 1.49E-04 | 33261.1326   |
| 13                              | 0.037006 | 7.41E-05 | 15681.0839   |
| $D^3\Pi_u - L^3\Pi_g$           |          |          |              |
| 0                               | 0.06986  | 4.28E-04 | 238185.7579  |
| 1                               | 0.058949 | 2.99E-04 | 160557.9738  |
| 2                               | 0.026566 | 5.97E-05 | 30852.4175   |
| $X^3\Sigma_g^- - D^3\Pi_u$      |          |          |              |
| 0                               | 0.193554 | 1.14E-04 | 18.9368      |
| 1                               | 0.173771 | 6.56E-07 | 0.0000056    |
| $X^3\Sigma_g^- - 2^3\Pi_u$      |          |          |              |
| 38                              | 0.001006 | 7.79E-08 | 8.3170       |
| 39                              | 0.001215 | 1.10E-07 | 11.1574      |
| 40                              | 0.00142  | 1.47E-07 | 14.0164      |
| 41                              | 0.001604 | 1.82E-07 | 16.4348      |
| 42                              | 0.00175  | 2.10E-07 | 17.9288      |
| 43                              | 0.001838 | 2.25E-07 | 18.1198      |
| 44                              | 0.001855 | 2.23E-07 | 16.8768      |
| 45                              | 0.001793 | 2.02E-07 | 14.3964      |
| 46                              | 0.001652 | 1.66E-07 | 11.1526      |
| 47                              | 0.001444 | 1.23E-07 | 7.7626       |
| 48                              | 0.001189 | 8.08E-08 | 4.7812       |
| 49                              | 0.000911 | 4.60E-08 | 2.5486       |
| 50                              | 0.000638 | 2.18E-08 | 1.1344       |
| 51                              | 0.000395 | 8.11E-09 | 0.3944       |
| 52                              | 0.000201 | 2.02E-09 | 0.0918       |
| 53                              | 0.000062 | 1.85E-10 | 0.0078       |
| $X^3\Sigma_g^- - H^3\Sigma_u^-$ |          |          |              |
| 6                               | 0.117423 | 8.85E-04 | 263884.6959  |
| 7                               | 0.165057 | 1.71E-03 | 487339.2212  |
| 8                               | 0.213514 | 2.80E-03 | 761434.5672  |
| 9                               | 0.256353 | 3.94E-03 | 1023775.9568 |
| 10                              | 0.287824 | 4.85E-03 | 1202428.2081 |
| 11                              | 0.303354 | 5.26E-03 | 1243141.0582 |
| 12                              | 0.300499 | 5.04E-03 | 1134050.3879 |
| 13                              | 0.280603 | 4.29E-03 | 918133.1197  |
| 14                              | 0.248277 | 3.27E-03 | 666511.4629  |
| 15                              | 0.208621 | 2.25E-03 | 435860.1793  |
| 16                              | 0.166095 | 1.39E-03 | 255564.1232  |
| 17                              | 0.125289 | 7.71E-04 | 134307.6450  |
| 18                              | 0.090244 | 3.89E-04 | 64251.5424   |
| $A^3\Sigma_u^+ - 2^3\Pi_g$      |          |          |              |

|                            |          |          |            |
|----------------------------|----------|----------|------------|
| 0                          | 0.047406 | 4.08E-05 | 243.6206   |
| 1                          | 0.065818 | 7.08E-05 | 341.5304   |
| 2                          | 0.066342 | 6.40E-05 | 244.6444   |
| 3                          | 0.054762 | 3.84E-05 | 113.3726   |
| 4                          | 0.037358 | 1.55E-05 | 34.3472    |
| 5                          | 0.019584 | 3.62E-06 | 5.8230     |
| 6                          | 0.004376 | 1.50E-07 | 0.1664     |
| $A^3\Sigma_u^+ - 3^3\Pi_g$ |          |          |            |
| 0                          | 0.117434 | 7.19E-04 | 35254.2952 |
| 1                          | 0.114882 | 6.64E-04 | 30307.2758 |
| 2                          | 0.086699 | 3.64E-04 | 15475.6484 |
| 3                          | 0.056562 | 1.49E-04 | 5897.6264  |
| 4                          | 0.032356 | 4.71E-05 | 1726.2372  |
| $A^3\Sigma_u^+ - L^3\Pi_g$ |          |          |            |
| 3                          | 0.007066 | 3.73E-06 | 376.1858   |
| 4                          | 0.007066 | 3.65E-06 | 351.0086   |
| 5                          | 0.018733 | 2.50E-05 | 2303.4220  |
| 6                          | 0.02736  | 5.22E-05 | 4589.9166  |
| 7                          | 0.018733 | 2.39E-05 | 2013.9850  |
| 8                          | 0.02736  | 5.00E-05 | 4028.6116  |
| 9                          | 0.046746 | 1.43E-04 | 11054.3830 |
| 10                         | 0.038567 | 9.53E-05 | 7080.3906  |
| 11                         | 0.023897 | 3.59E-05 | 2556.6654  |
| $B^3\Delta_u - 2^3\Pi_g$   |          |          |            |
| 0                          | 0.049794 | 2.52E-05 | 188.2762   |
| 1                          | 0.070571 | 4.58E-05 | 280.5640   |
| 2                          | 0.075901 | 4.75E-05 | 233.8650   |
| 3                          | 0.071191 | 3.71E-05 | 143.2513   |
| 4                          | 0.061216 | 2.39E-05 | 70.6813    |
| 5                          | 0.050223 | 1.38E-05 | 30.0527    |
| 6                          | 0.03925  | 7.06E-06 | 10.7190    |
| 7                          | 0.029936 | 3.31E-06 | 3.2772     |
| 8                          | 0.022292 | 1.40E-06 | 0.8077     |
| $B^3\Delta_u - E^3\Phi_g$  |          |          |            |
| 0                          | 0.068175 | 6.16E-05 | 780.8197   |
| 1                          | 0.087037 | 9.30E-05 | 1014.7552  |
| 2                          | 0.084054 | 8.01E-05 | 742.9175   |
| 3                          | 0.070714 | 5.20E-05 | 405.7512   |
| 4                          | 0.054498 | 2.81E-05 | 182.3589   |
| 5                          | 0.040067 | 1.37E-05 | 72.8692    |
| 6                          | 0.028036 | 6.02E-06 | 25.5701    |

|                               |          |          |              |
|-------------------------------|----------|----------|--------------|
| 7                             | 0.019151 | 2.49E-06 | 8.2583       |
| $B^3\Delta_u - 3^3\Pi_g$      |          |          |              |
| 0                             | 0.077972 | 1.65E-04 | 8778.5241    |
| 1                             | 0.078405 | 1.61E-04 | 7964.3126    |
| 2                             | 0.062897 | 9.98E-05 | 4586.0071    |
| 3                             | 0.045692 | 5.07E-05 | 2160.1410    |
| 4                             | 0.031305 | 2.29E-05 | 902.7368     |
| 5                             | 0.020941 | 9.85E-06 | 358.6841     |
| $B^3\Delta_u - L^3\Pi_g$      |          |          |              |
| 5                             | 0.008972 | 2.93E-06 | 281.5238     |
| 6                             | 0.011744 | 4.90E-06 | 447.5412     |
| 7                             | 0.014603 | 7.39E-06 | 641.5841     |
| 8                             | 0.01736  | 1.02E-05 | 839.6340     |
| 9                             | 0.019895 | 1.30E-05 | 1020.5560    |
| 10                            | 0.022066 | 1.56E-05 | 1160.6104    |
| 11                            | 0.023805 | 1.77E-05 | 1247.7139    |
| 12                            | 0.02502  | 1.90E-05 | 1271.9037    |
| 13                            | 0.02575  | 1.96E-05 | 1242.1600    |
| 14                            | 0.025938 | 1.94E-05 | 1160.9821    |
| 15                            | 0.025698 | 1.85E-05 | 1048.8665    |
| 16                            | 0.025015 | 1.70E-05 | 913.8931     |
| 17                            | 0.024004 | 1.53E-05 | 773.1633     |
| 18                            | 0.022716 | 1.33E-05 | 635.6808     |
| 19                            | 0.021217 | 1.13E-05 | 508.6970     |
| 20                            | 0.019598 | 9.33E-06 | 397.8220     |
| 21                            | 0.017898 | 7.56E-06 | 303.9315     |
| 22                            | 0.01736  | 6.90E-06 | 261.7769     |
| 23                            | 0.014494 | 4.67E-06 | 166.9740     |
| $X^3\Sigma_g^- - K^3\Sigma_u$ |          |          |              |
| 0                             | 0.224095 | 4.68E-03 | 2935611.9831 |
| 1                             | 0.201324 | 3.72E-03 | 2258109.3621 |
| 2                             | 0.201324 | 3.66E-03 | 2151329.8317 |
| 3                             | 0.117821 | 1.23E-03 | 701553.6955  |
| 4                             | 0.062387 | 3.40E-04 | 187189.6189  |
| 5                             | 0.031644 | 8.60E-05 | 45809.4903   |
| $X^3\Sigma_g^- - 3^3\Sigma_u$ |          |          |              |
| 23                            | 0.022172 | 3.95E-05 | 18486.9599   |
| 24                            | 0.031058 | 7.64E-05 | 34640.2028   |
| 25                            | 0.041806 | 1.36E-04 | 59919.4127   |
| 26                            | 0.054205 | 2.26E-04 | 96141.6147   |
| 27                            | 0.067389 | 3.43E-04 | 141786.8630  |



|                                |          |            |             |
|--------------------------------|----------|------------|-------------|
| 28                             | 0.080166 | 4.78E-04   | 191400.8938 |
| 29                             | 0.091212 | 6.09E-04   | 236296.3533 |
| 30                             | 0.098844 | 7.04E-04   | 264559.7785 |
| 31                             | 0.101884 | 7.36E-04   | 267916.8544 |
| 32                             | 0.099583 | 6.92E-04   | 243897.6217 |
| 33                             | 0.092053 | 5.82E-04   | 198543.8070 |
| 34                             | 0.080313 | 4.36E-04   | 143938.7783 |
| 35                             | 0.065994 | 2.90E-04   | 92543.4567  |
| 36                             | 0.051083 | 1.71E-04   | 52785.0866  |
| 37                             | 0.037297 | 8.95E-05   | 26781.6251  |
| $2^1 \Pi_u \cdot f^1 \Pi_g$    |          |            |             |
| 6                              | 0.026702 | 2.8018E-05 | 3127.5614   |
| 7                              | 0.051184 | 1.0101E-04 | 10853.5623  |
| 8                              | 0.085440 | 2.7618E-04 | 28574.2548  |
| 9                              | 0.124202 | 5.7308E-04 | 57171.8115  |
| 10                             | 0.152212 | 8.4546E-04 | 81384.9845  |
| 11                             | 0.154582 | 8.5721E-04 | 79739.3344  |
| 12                             | 0.122512 | 5.2958E-04 | 47657.4509  |
| 13                             | 0.068717 | 1.6400E-04 | 14299.5810  |
| 14                             | 0.019905 | 1.3556E-05 | 1146.9979   |
| $g^1 \Delta_u \cdot f^1 \Pi_g$ |          |            |             |
| 0                              | 0.047487 | 6.5169E-05 | 3934.4240   |
| 1                              | 0.039037 | 4.2653E-05 | 2415.4030   |
| 2                              | 0.020392 | 1.1269E-05 | 598.3111    |
| 3                              | 0.007458 | 1.4592E-06 | 72.6164     |
| 4                              | 0.002154 | 1.1783E-07 | 5.4955      |
| $f^1 \Pi_g \cdot e^1 \Sigma_u$ |          |            |             |
| 0                              | 0.198450 | 1.2155E-03 | 20926.6941  |
| 1                              | 0.200349 | 1.1614E-03 | 17568.9243  |
| 2                              | 0.165421 | 7.3957E-04 | 9762.6760   |
| 3                              | 0.124134 | 3.8733E-04 | 4422.5378   |
| 4                              | 0.087789 | 1.7940E-04 | 1756.7938   |
| 5                              | 0.060663 | 7.9000E-05 | 657.9402    |
| 6                              | 0.040506 | 3.2251E-05 | 225.1853    |
| 7                              | 0.026593 | 1.2652E-05 | 73.1731     |
| 8                              | 0.017309 | 4.8330E-06 | 22.7282     |
| $2^1 \Pi_g \cdot e^1 \Sigma_u$ |          |            |             |
| 0                              | 0.026126 | 4.0385E-05 | 2555.0010   |
| 1                              | 0.025217 | 3.6396E-05 | 2154.6743   |
| 2                              | 0.015711 | 1.3658E-05 | 755.5849    |
| 3                              | 0.008651 | 3.9996E-06 | 206.4081    |

|                        |          |            |             |
|------------------------|----------|------------|-------------|
| 4                      | 0.004552 | 1.0688E-06 | 51.3900     |
| 5                      | 0.002445 | 2.9752E-07 | 13.3183     |
| 6                      | 0.001246 | 7.4477E-08 | 3.0957      |
| 7                      | 0.000599 | 1.6565E-08 | 0.6387      |
| $2^3\Pi_u-C^3\Pi_g$    |          |            |             |
| 18                     | 0.013565 | 3.9787E-06 | 134.4534    |
| 19                     | 0.021718 | 9.8337E-06 | 308.9747    |
| 20                     | 0.032375 | 2.1067E-05 | 615.2353    |
| 21                     | 0.044671 | 3.8665E-05 | 1049.3693   |
| 22                     | 0.056313 | 5.9236E-05 | 1494.0783   |
| 23                     | 0.063813 | 7.3339E-05 | 1719.6028   |
| 24                     | 0.063350 | 6.9706E-05 | 1520.1596   |
| 25                     | 0.052692 | 4.6528E-05 | 944.5174    |
| 26                     | 0.033721 | 1.8395E-05 | 347.9973    |
| 27                     | 0.013197 | 2.7220E-06 | 48.0556     |
| $H^3\Sigma_u-C^3\Pi_g$ |          |            |             |
| 0                      | 0.008897 | 3.9101E-06 | 172.4014    |
| 1                      | 0.020233 | 1.9324E-05 | 778.1092    |
| 2                      | 0.030662 | 4.2344E-05 | 1552.3558   |
| 3                      | 0.036006 | 5.5619E-05 | 1849.9816   |
| 4                      | 0.034870 | 4.9602E-05 | 1491.6505   |
| 5                      | 0.028521 | 3.1492E-05 | 852.9413    |
| 6                      | 0.020117 | 1.4835E-05 | 360.2942    |
| 7                      | 0.012320 | 5.2583E-06 | 114.0305    |
| 8                      | 0.006395 | 1.3351E-06 | 25.7220     |
| 9                      | 0.002669 | 2.1859E-07 | 3.7213      |
| $K^3\Sigma_u-C^3\Pi_g$ |          |            |             |
| 0                      | 0.173818 | 2.7102E-03 | 394116.2656 |
| 1                      | 0.065048 | 3.7029E-04 | 51249.2029  |
| $3^3\Sigma_u-C^3\Pi_g$ |          |            |             |
| 9                      | 0.002053 | 4.5599E-07 | 96.5386     |
| 10                     | 0.005111 | 2.7771E-06 | 567.4072    |
| 11                     | 0.009646 | 9.7179E-06 | 1916.0287   |
| 12                     | 0.015035 | 2.3196E-05 | 4413.5554   |
| 13                     | 0.019961 | 4.0167E-05 | 7376.9636   |
| 14                     | 0.023473 | 5.4572E-05 | 9674.8522   |
| 15                     | 0.025536 | 6.3464E-05 | 10863.5846  |
| 16                     | 0.025759 | 6.3462E-05 | 10491.1585  |
| 17                     | 0.023212 | 5.0649E-05 | 8088.7704   |
| 18                     | 0.017192 | 2.7316E-05 | 4215.8019   |
| 19                     | 0.009920 | 8.9416E-06 | 1334.2232   |

|                            |          |            |           |
|----------------------------|----------|------------|-----------|
| 20                         | 0.004716 | 1.9878E-06 | 286.9158  |
| 21                         | 0.002124 | 3.9662E-07 | 55.4085   |
| $2^3\Sigma_g^- - 2^3\Pi_u$ |          |            |           |
| 0                          | 0.019894 | 1.1990E-06 | 0.1989    |
| 1                          | 0.016144 | 5.3634E-07 | 0.0410    |
| 2                          | 0.010024 | 1.1065E-07 | 0.0024    |
| 3                          | 0.005377 | 4.6535E-09 | 0.0000    |
| $L^3\Pi_g - 2^3\Pi_u$      |          |            |           |
| 0                          | 0.027541 | 8.0411E-06 | 65.3281   |
| 1                          | 0.030537 | 8.8545E-06 | 57.7082   |
| 2                          | 0.022565 | 4.2860E-06 | 21.9531   |
| 3                          | 0.012893 | 1.2247E-06 | 4.8057    |
| 4                          | 0.005792 | 2.1278E-07 | 0.6187    |
| $2^3\Pi_u - 2^3\Pi_g$      |          |            |           |
| 17                         | 0.014462 | 2.8477E-06 | 38.1639   |
| 18                         | 0.014462 | 2.6834E-06 | 31.9326   |
| 19                         | 0.033226 | 1.3309E-05 | 139.8347  |
| 20                         | 0.046363 | 2.4274E-05 | 223.7599  |
| 21                         | 0.061160 | 3.9425E-05 | 316.5982  |
| 22                         | 0.076262 | 5.6987E-05 | 395.5062  |
| 23                         | 0.089718 | 7.2991E-05 | 433.8645  |
| 24                         | 0.099379 | 8.2455E-05 | 415.4544  |
| 25                         | 0.103348 | 8.1611E-05 | 344.4235  |
| 26                         | 0.100456 | 7.0080E-05 | 244.3027  |
| 27                         | 0.090809 | 5.1620E-05 | 146.2132  |
| 28                         | 0.075820 | 3.2117E-05 | 72.4679   |
| 29                         | 0.058062 | 1.6608E-05 | 29.1349   |
| 30                         | 0.040553 | 7.0355E-06 | 9.3081    |
| 31                         | 0.025790 | 2.4229E-06 | 2.3239    |
| 32                         | 0.014958 | 6.7573E-07 | 0.4455    |
| 33                         | 0.007774 | 1.4569E-07 | 0.0612    |
| $H^3\Sigma_u^- - 2^3\Pi_g$ |          |            |           |
| 0                          | 0.027582 | 2.2439E-05 | 352.8047  |
| 1                          | 0.066488 | 1.2141E-04 | 1654.7134 |
| 2                          | 0.098366 | 2.4634E-04 | 2885.4100 |
| 3                          | 0.106464 | 2.6620E-04 | 2653.3939 |
| 4                          | 0.093843 | 1.8974E-04 | 1591.7650 |
| 5                          | 0.070736 | 9.8223E-05 | 684.0333  |
| 6                          | 0.044169 | 3.4620E-05 | 197.0133  |
| 7                          | 0.021872 | 7.6026E-06 | 34.7011   |
| 8                          | 0.009609 | 1.2987E-06 | 4.6434    |

| $K^2\Sigma_u^- - 2^3\Pi_g$      |          |            |             |
|---------------------------------|----------|------------|-------------|
| 0                               | 0.254857 | 4.5340E-03 | 399267.1813 |
| 1                               | 0.104355 | 7.3804E-04 | 61261.0373  |
| 2                               | 0.021852 | 3.1406E-05 | 2455.0043   |
| $3^3\Sigma_u^- - 2^3\Pi_g$      |          |            |             |
| 8                               | 0.008419 | 6.4933E-06 | 984.7847    |
| 9                               | 0.015047 | 2.0336E-05 | 2964.7860   |
| 10                              | 0.024339 | 5.2162E-05 | 7308.9976   |
| 11                              | 0.035976 | 1.1171E-04 | 15040.6554  |
| 12                              | 0.048263 | 1.9707E-04 | 25491.5018  |
| 13                              | 0.058515 | 2.8391E-04 | 35272.0981  |
| 14                              | 0.063947 | 3.3226E-04 | 39640.4363  |
| 15                              | 0.062243 | 3.0843E-04 | 35327.3389  |
| 16                              | 0.053567 | 2.2380E-04 | 24604.0737  |
| 17                              | 0.040060 | 1.2261E-04 | 12934.1271  |
| 18                              | 0.025623 | 4.9130E-05 | 4971.7972   |
| 19                              | 0.013708 | 1.3771E-05 | 1336.4449   |
| 20                              | 0.006074 | 2.6473E-06 | 246.3232    |
| $2^1\Pi_u - d^1\Sigma_g^+$      |          |            |             |
| 22                              | 0.001766 | 2.7422E-07 | 38.3455     |
| 23                              | 0.002912 | 7.2646E-07 | 96.3690     |
| 24                              | 0.004570 | 1.7435E-06 | 219.4950    |
| 25                              | 0.006759 | 3.7150E-06 | 443.9989    |
| 26                              | 0.009406 | 7.0114E-06 | 795.8802    |
| 27                              | 0.012205 | 1.1510E-05 | 1241.7094   |
| 28                              | 0.014635 | 1.6138E-05 | 1655.6665   |
| 29                              | 0.016041 | 1.8915E-05 | 1847.1885   |
| 30                              | 0.015819 | 1.7958E-05 | 1671.0288   |
| 31                              | 0.013739 | 1.3231E-05 | 1174.5132   |
| 32                              | 0.010162 | 7.0743E-06 | 599.9486    |
| 33                              | 0.006049 | 2.4523E-06 | 198.9970    |
| 34                              | 0.002598 | 4.4298E-07 | 34.4580     |
| 35                              | 0.000564 | 2.0454E-08 | 1.5283      |
| $3^3\Sigma_u^- - 2^3\Sigma_g^-$ |          |            |             |
| 2                               | 0.018148 | 7.3517E-06 | 264.7980    |
| 3                               | 0.032184 | 2.2738E-05 | 792.1231    |
| 4                               | 0.049277 | 5.2420E-05 | 1765.8552   |
| 5                               | 0.067537 | 9.6824E-05 | 3153.7507   |
| 6                               | 0.084820 | 1.5017E-04 | 4729.3368   |
| 7                               | 0.099053 | 2.0139E-04 | 6132.9405   |
| 8                               | 0.108760 | 2.3877E-04 | 7032.6138   |

|                                 |          |            |            |
|---------------------------------|----------|------------|------------|
| 9                               | 0.112411 | 2.5088E-04 | 7148.7606  |
| 10                              | 0.112411 | 2.4682E-04 | 6806.6738  |
| 11                              | 0.107047 | 2.2025E-04 | 5881.8158  |
| 12                              | 0.098223 | 1.8253E-04 | 4723.0931  |
| 13                              | 0.087280 | 1.4192E-04 | 3560.6908  |
| 14                              | 0.075495 | 1.0460E-04 | 2546.8484  |
| 15                              | 0.063821 | 7.3681E-05 | 1742.8190  |
| 16                              | 0.052916 | 4.9955E-05 | 1149.3231  |
| 17                              | 0.043203 | 3.2865E-05 | 736.4854   |
| 18                              | 0.034849 | 2.1120E-05 | 461.6745   |
| 19                              | 0.027862 | 1.3343E-05 | 284.9377   |
| 20                              | 0.022000 | 8.2291E-06 | 171.9586   |
| 21                              | 0.017492 | 5.1509E-06 | 105.5121   |
| 22                              | 0.013866 | 3.2071E-06 | 64.5059    |
| 23                              | 0.011216 | 2.0811E-06 | 41.1647    |
| 24                              | 0.009170 | 1.3808E-06 | 26.9114    |
| $2^3\Sigma_g^- - H^3\Sigma_u^-$ |          |            |            |
| 11                              | 0.029789 | 6.6368E-06 | 26.8345    |
| 12                              | 0.048652 | 1.6093E-05 | 53.7719    |
| 13                              | 0.074266 | 3.3820E-05 | 91.9232    |
| 14                              | 0.105427 | 6.0891E-05 | 132.0989   |
| 15                              | 0.139307 | 9.3931E-05 | 159.0700   |
| 16                              | 0.171580 | 1.2416E-04 | 159.6317   |
| 17                              | 0.196491 | 1.3939E-04 | 131.3446   |
| 18                              | 0.209570 | 1.3266E-04 | 87.4864    |
| 19                              | 0.208267 | 1.0617E-04 | 45.9842    |
| 20                              | 0.191827 | 6.9647E-05 | 18.0349    |
| 21                              | 0.162118 | 3.5634E-05 | 4.7352     |
| 22                              | 0.123535 | 1.2776E-05 | 0.6472     |
| 23                              | 0.083051 | 2.3198E-06 | 0.0190     |
| $3^3\Pi_g^- - 2^3\Sigma_u^+$    |          |            |            |
| 0                               | 0.109194 | 3.1710E-04 | 4053.0709  |
| 1                               | 0.038535 | 3.5565E-05 | 368.6742   |
| 2                               | 0.006390 | 8.7699E-07 | 7.3101     |
| 3                               | 0.001134 | 2.4614E-08 | 0.1631     |
| $L^3\Pi_g^- - 2^3\Sigma_u^+$    |          |            |            |
| 0                               | 0.055816 | 1.7002E-04 | 9150.5045  |
| 1                               | 0.070737 | 2.5984E-04 | 12662.2882 |
| 2                               | 0.074138 | 2.7182E-04 | 12014.3815 |
| 3                               | 0.071654 | 2.4196E-04 | 9710.8548  |
| 4                               | 0.066004 | 1.9574E-04 | 7140.4853  |

|                           |          |            |           |
|---------------------------|----------|------------|-----------|
| 5                         | 0.059103 | 1.4968E-04 | 4966.6764 |
| 6                         | 0.051566 | 1.0872E-04 | 3284.9607 |
| 7                         | 0.044381 | 7.6899E-05 | 2118.1059 |
| 8                         | 0.037527 | 5.2553E-05 | 1322.5782 |
| 9                         | 0.031843 | 3.6207E-05 | 834.2295  |
| 10                        | 0.026601 | 2.4203E-05 | 511.6876  |
| 11                        | 0.022370 | 1.6417E-05 | 319.3238  |
| 12                        | 0.018664 | 1.0981E-05 | 197.1704  |
| 13                        | 0.015624 | 7.4063E-06 | 123.1938  |
| 14                        | 0.013135 | 5.0492E-06 | 78.1449   |
| 15                        | 0.011024 | 3.4390E-06 | 49.7661   |
| $K^3\Sigma_u - L^3\Pi_g$  |          |            |           |
| 0                         | 0.023563 | 4.3820E-06 | 4.9327    |
| 1                         | 0.037559 | 6.4157E-06 | 2.3982    |
| 2                         | 0.036136 | 1.7733E-06 | 0.0591    |
| $g^4\Delta_u - h^4\Phi_g$ |          |            |           |
| 0                         | 0.053375 | 4.2016E-05 | 660.6078  |
| 1                         | 0.070119 | 6.7369E-05 | 914.2721  |
| 2                         | 0.056652 | 4.0649E-05 | 471.3771  |
| 3                         | 0.034782 | 1.4084E-05 | 137.9761  |
| 4                         | 0.017114 | 3.1131E-06 | 25.4233   |
| $1^5\Pi_g - 1^5\Pi_u$     |          |            |           |
| 30                        | 0.111069 | 1.6167E-04 | 2007.2782 |
| 31                        | 0.125013 | 1.9364E-04 | 2148.8833 |
| 32                        | 0.137266 | 2.2029E-04 | 2176.4707 |
| 33                        | 0.146822 | 2.3730E-04 | 2078.7017 |
| 34                        | 0.152906 | 2.4180E-04 | 1869.5396 |
| 35                        | 0.154914 | 2.3261E-04 | 1579.7225 |
| 36                        | 0.152413 | 2.1047E-04 | 1248.9279 |
| 37                        | 0.145445 | 1.7866E-04 | 921.1275  |
| 38                        | 0.134437 | 1.4184E-04 | 631.5019  |
| 39                        | 0.120077 | 1.0480E-04 | 400.1972  |
